# Supplementary material
Source: PubMed Central journal article supplement (PMC9047748)
Supplement: jamasurg-e220809-s003.pdf [file jamasurg-e220809-s003.pdf]

## Data Sharing Statement

Lawson. Surgical Plating vs Closed Reduction for Fractures in the Distal Radius in Older Patients. *JAMA Surg*. Published April 27, 2022. doi:10.1001/jamasurg.2022.0809

### Data

**Data available:** Yes

**Data types:** Other (please specify)

**Additional Information:** Deidentified participant-level dataset and statistical code will be made available for collaborative research projects, on request of the chief investigator ([iaharris1@gmail.com](mailto:iaharris1@gmail.com)).

**How to access data:** Deidentified participant-level dataset and statistical code will be made available for collaborative research projects, on request of the chief investigator ([iaharris1@gmail.com](mailto:iaharris1@gmail.com)).

**When available:** With publication

### Supporting Documents

**Document types:** None

### Additional Information

**Who can access the data:** Deidentified participant-level dataset and statistical code will be made available for collaborative research projects, on request of the chief investigator ([iaharris1@gmail.com](mailto:iaharris1@gmail.com)).

**Types of analyses:** Deidentified participant-level dataset and statistical code will be made available for collaborative research projects, on request of the chief investigator ([iaharris1@gmail.com](mailto:iaharris1@gmail.com)).

**Mechanisms of data availability:** Deidentified participant-level dataset and statistical code will be made available for collaborative research projects, on request of the chief investigator ([iaharris1@gmail.com](mailto:iaharris1@gmail.com)).
